# Supplementary material for: Proteomic analysis reveals a protective role of specific macrophage subsets in liver repair
Source: PubMed Central journal article supplement (PMC6393665; doi:10.1038/s41598-019-39007-6), 2019-02-27
Supplement: 41598_2019_39007_MOESM1_ESM.pdf [file 41598_2019_39007_MOESM1_ESM.pdf]

# **Proteomic analysis reveals a protective role of specific macrophage subsets in liver repair**

**Wenting Yang<sup>1</sup>, Xinyuan Zhao<sup>1</sup>, Yuandong Tao<sup>1</sup>, Yan Wu<sup>1</sup>, Fuchu He<sup>1,\*</sup>, and Li Tang<sup>1,2,\*</sup>**

<sup>1</sup>State Key Laboratory of Proteomics, National Center for Protein Sciences, Beijing. Beijing Proteome Research Center, Beijing Institute of Lifeomics, Beijing 102206, P.R. China

<sup>2</sup>Department of Biochemistry and Molecular Biology, Anhui Medical University, Hefei, Anhui Province, 230032, P.R. China

## **Correspondence:**

\*(F.H.) E-mail: [hefc@nic.bmi.ac.cn](mailto:hefc@nic.bmi.ac.cn); Tel and Fax: +86-10-68171208

\*(L.T.) E-mail: [tangli08@aliyun.com](mailto:tangli08@aliyun.com); Tel and Fax: +86-10-61777091

**Figure S1**

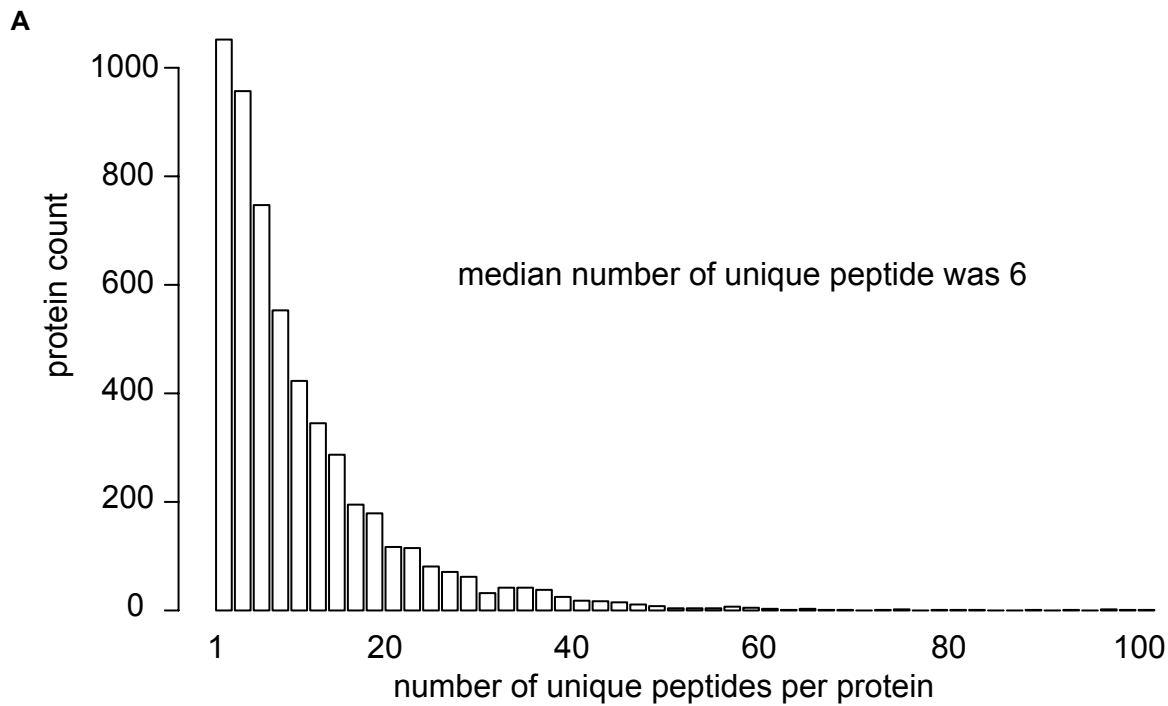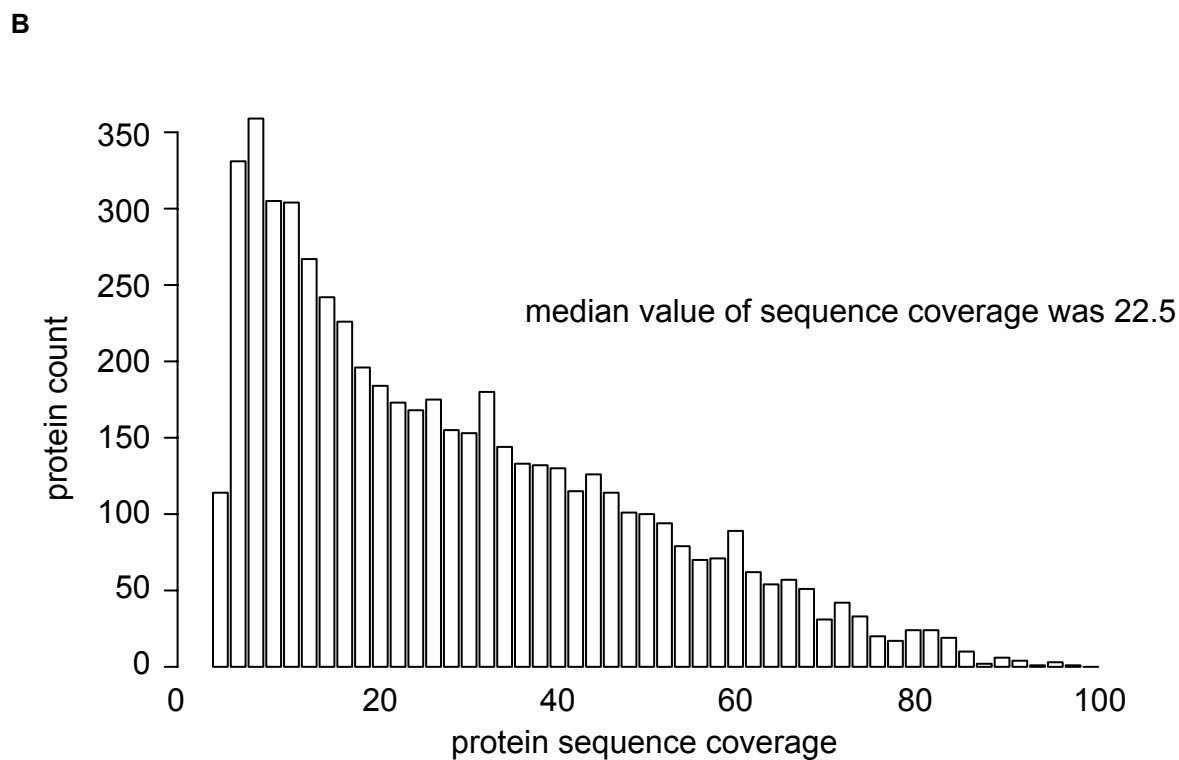

**Figure S1. Histogram of the unique peptides and sequence coverage for the quantified proteins.**

(A) Histogram of the unique peptides for the quantified proteins. The median number of unique peptide was 6.

(B) Histogram of the sequence coverage (%) for the quantified proteins. The median value of protein sequence coverage was 22.5.

**Figure S2**

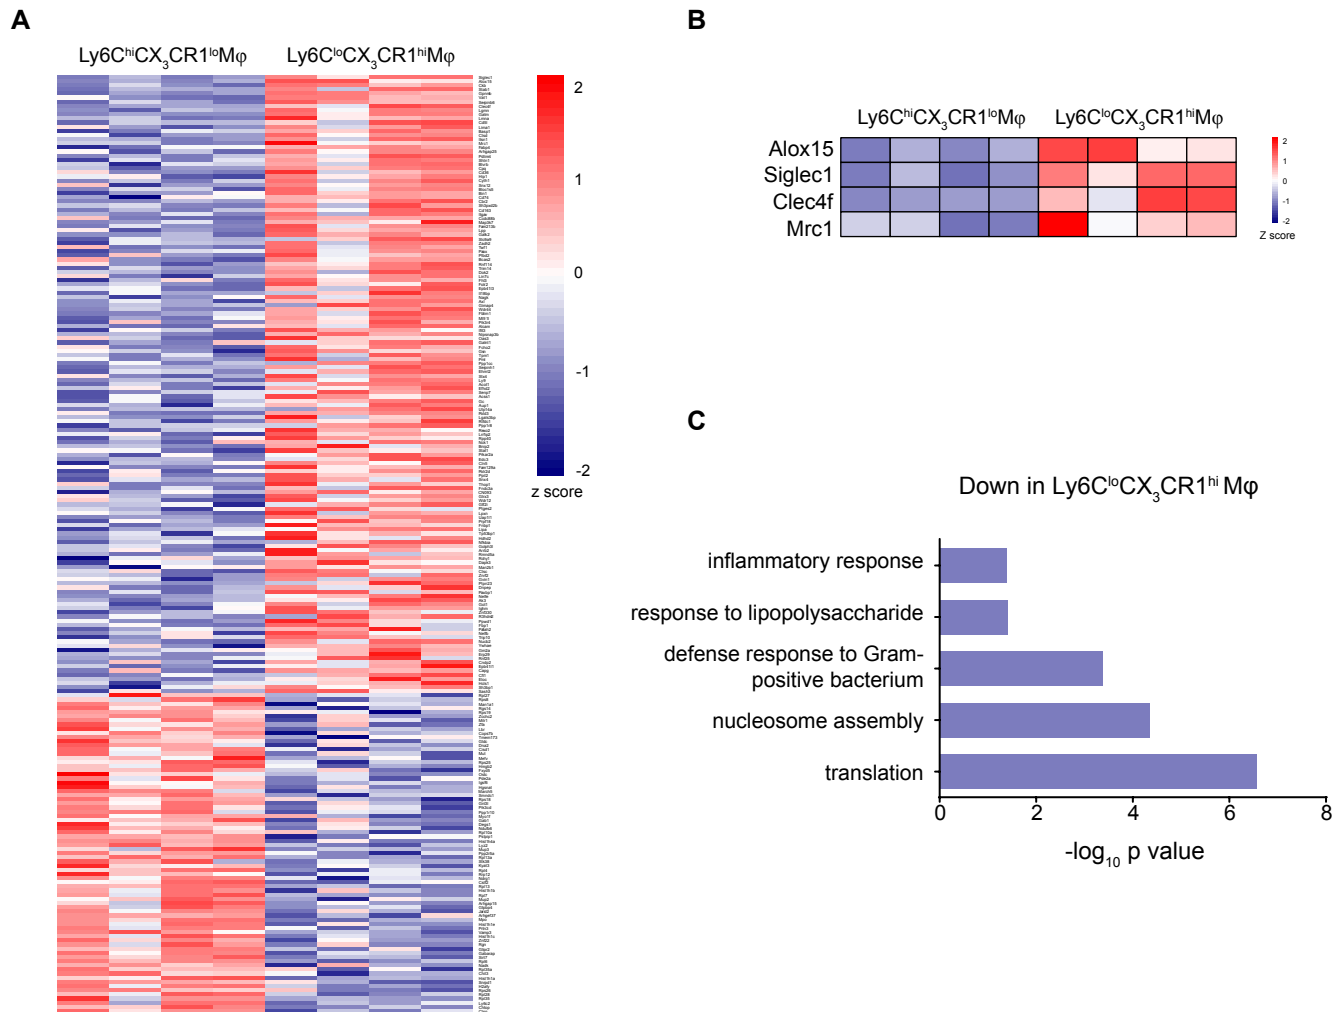

**Figure S2. Proteomic analysis of distinct macrophage subsets from distinct phases in APAP-induced liver injury.**

(A) Heatmap showing the differentially expressed genes in 24 h Ly6C<sup>hi</sup>CX<sub>3</sub>CR1<sup>lo</sup> macrophages as compared to 72 h Ly6C<sup>lo</sup>CX<sub>3</sub>CR1<sup>hi</sup> macrophages. Row-based Z score normalized.

(B) Heatmap showing differential expression of the indicated genes in 24 h Ly6C<sup>hi</sup>CX<sub>3</sub>CR1<sup>lo</sup> macrophages as compared to 72 h Ly6C<sup>lo</sup>CX<sub>3</sub>CR1<sup>hi</sup> macrophages.

(C) Gene Ontology (GO) enrichment analysis of down-regulated genes in 72 h Ly6C<sup>lo</sup>CX<sub>3</sub>CR1<sup>hi</sup> macrophages was classified by their biological functions.

### Figure S3

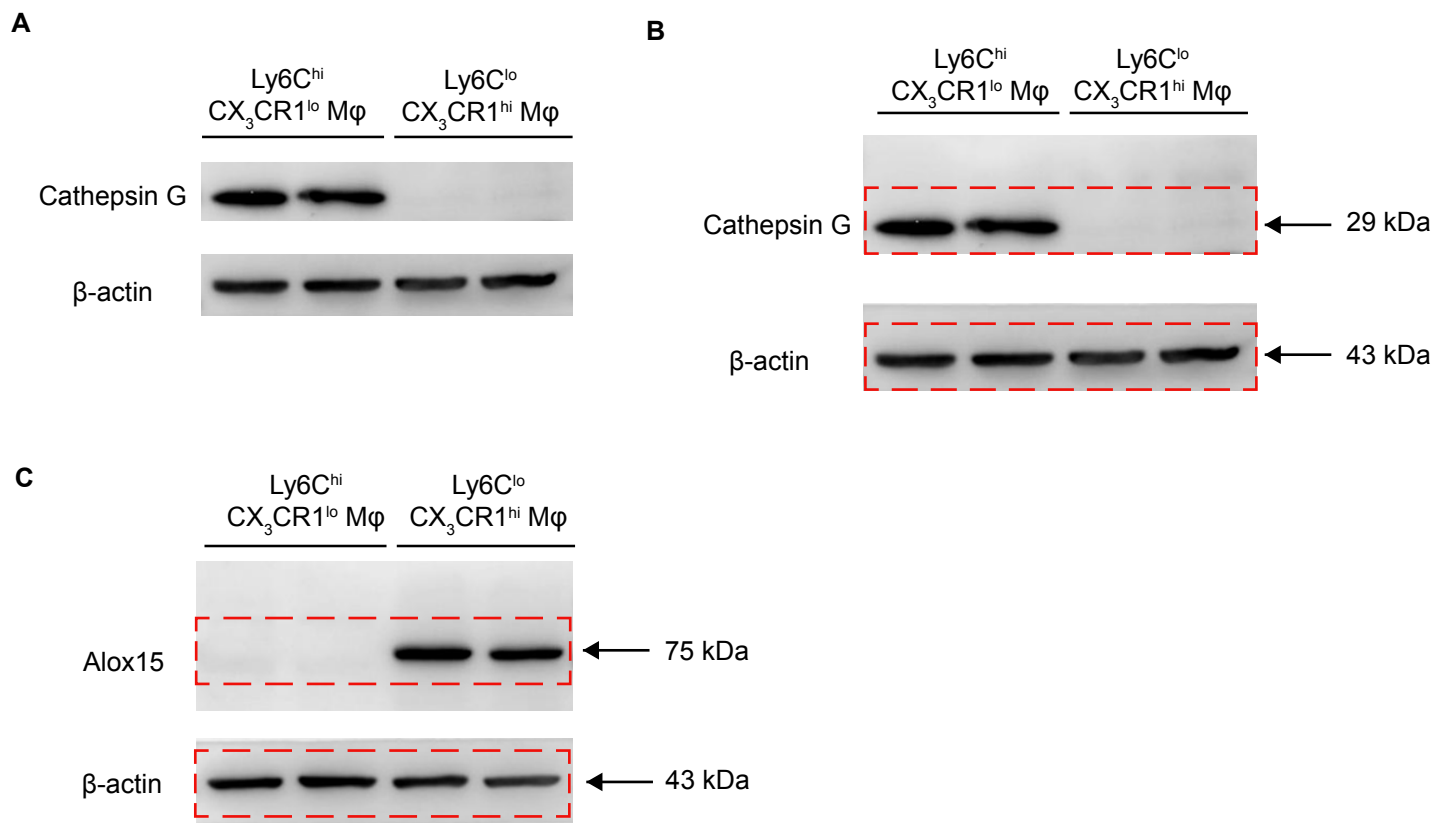

### Figure S3. Western blot analysis for the differentially expressed proteins.

(A) Western blot analysis for the indicated down-regulated proteins.

(B) Full-length western blots of **Figure S3A**. The Red dotted lines show the cropping locations.

(C) Full-length western blots of **Figure 4A**.
